# Supplementary material for: Twisted BODIPY derivative: intersystem crossing, electron spin polarization and application as a novel photodynamic therapy reagent
Source: Royal Society of Chemistry journal article supplement (doi:10.1039/d1cp00948f), 2021-01-01
Supplement: d1cp00948f1.pdf [file d1cp00948f1.pdf]

## Electronic Supplementary Information for:

# Twisted Bodipy Derivative: Intersystem Crossing, Electron Spin Polarization and Application as a Novel Photodynamic Therapy Reagent

Yu Dong,<sup>‡<sup>a</sup></sup> Prashant Kumar,<sup>‡<sup>b</sup></sup> Partha Maity,<sup>‡<sup>c</sup></sup> Ivan Kurganskii,<sup>d</sup> Shujing Li,<sup>e</sup> Ayhan Elmali,<sup>f</sup>  
Jianzhang Zhao,<sup>\*<sup>a</sup></sup> Daniel Escudero,<sup>\*<sup>b</sup></sup> Huijian Wu,<sup>\*<sup>e</sup></sup> Ahmet Karatay,<sup>\*<sup>f</sup></sup> Omar F. Mohammed<sup>\*<sup>c</sup></sup>  
and Matvey Fedin<sup>\*<sup>d</sup></sup>

<sup>a</sup> State Key Laboratory of Fine Chemicals, School of Chemical Engineering, Dalian University of Technology, E-208 West Campus, 2 Ling Gong Road, Dalian 116024, P. R. China. E-mail: zhaojzh@dlut.edu.cn

<sup>b</sup> Department of Chemistry, KU Leuven, Celestijnenlaan 200F, B-3001 Leuven, Belgium.

Email: Daniel.escudero@kuleuven.be

<sup>c</sup> Division of Physical Sciences and Engineering, King Abdullah University of Science and Technology (KAUST), Thuwal 23955-6900, Kingdom of Saudi Arabia. Email: omar.abdelsaboer@kaust.edu.sa

<sup>d</sup> International Tomography Center, SB RAS Institutskaya Str., 3A, and Novosibirsk State University, Pirogova str. 2, 630090 Novosibirsk, Russia. Email: mfedin@tomo.nsc.ru

<sup>e</sup> School of Life Science and Biotechnology, Dalian University of Technology, Dalian 116024, P. R. China. E-mail: wuhj@dlut.edu.cn

<sup>f</sup> Department of Chemistry, Faculty of Science, and Department of Engineering Physics, Faculty of Engineering, Ankara University, 06100 Beşevler, Ankara, Turkey. Email: Ahmet.Karatay@eng.ankara.edu.tr

<sup>‡</sup> These authors contributed equally to this work.

## Table of Contents

|                                                                               |         |
|-------------------------------------------------------------------------------|---------|
| 1.0 UV-Vis Absorption and Fluorescence Spectra.....                           | S3–S5   |
| 2.0 Singlet Oxygen Quantum Yield.....                                         | S6      |
| 3.0 Electrochemical and Spectroelectrochemistry Data.....                     | S7      |
| 4.0 Sub-nanosecond Time-Resolved Transient Absorption Spectra.....            | S8      |
| 5.0 Nanosecond Time-Resolved Transient Absorption Spectra.....                | S9      |
| 6.0 TREPR Spectra of the Triplet State of BDP-1 at Different Delay Times..... | S10     |
| 7.0 DFT Calculation.....                                                      | S11–S12 |
| 8.0 Application in Photodynamic Therapy.....                                  | S13–S14 |

### 1.0 UV-Vis Absorption and Fluorescence Spectra.

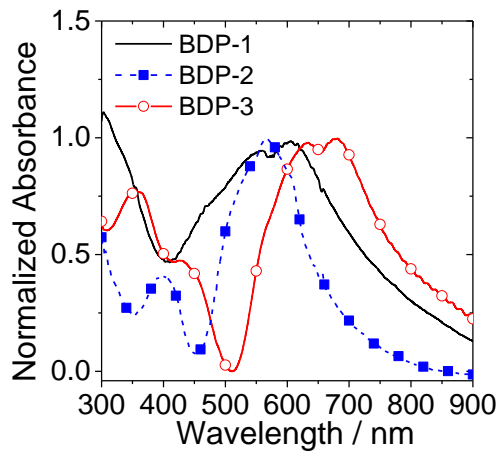

**Fig. S1** Normalized absorption of **BDP-1**, **BDP-2** and **BDP-3** in film (Clear Flex 50<sup>®</sup> film) prepared by evaporating solvent of DCM solution of compounds. 20 °C.

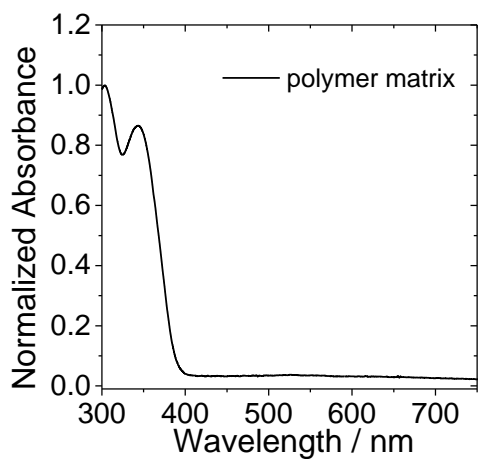

**Fig. S2** Normalized absorption of polymer matrix film (Clear Flex 50<sup>®</sup> film) alone prepared by evaporating solvent of DCM solution. 20 °C.

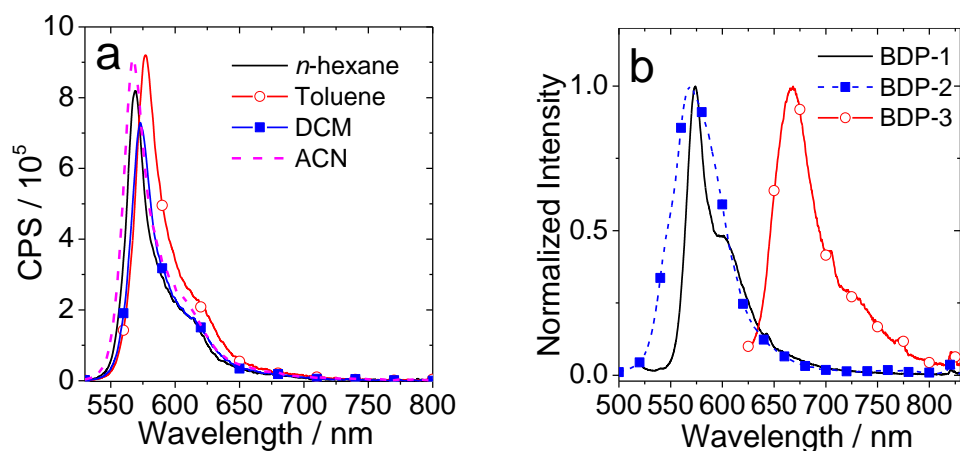

**Fig. S3** Fluorescence emission spectra and of (a) **BDP-1** in different solvents. Optically matched solutions were used.  $A = 0.142$ ,  $\lambda_{ex} = 520$  nm. (b) Normalized fluorescence emission spectra of **BDP-1**, **BDP-2** and **BDP-3** in Clear Flex 50<sup>®</sup> film. 20 °C.

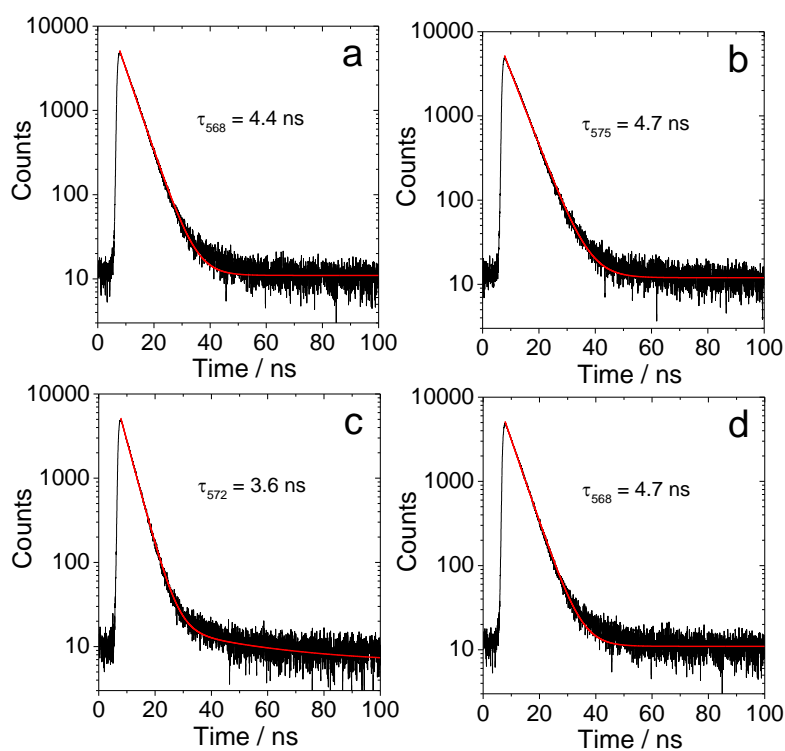

**Fig. S4** Fluorescence decay curves of **BDP-1** (a) In *n*-hexane, (b) In toluene, (c) In DCM and (d) In ACN.  $c = 1.0 \times 10^{-5}$  M,  $\lambda_{ex} = 510$  nm. 20 °C.

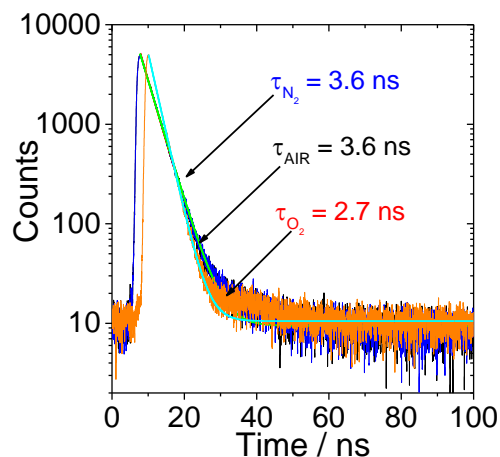

**Fig. S5** Fluorescence decay curves of **BDP-1** in DCM under nitrogen ( $N_2$ ), oxygen ( $O_2$ ) and air atmosphere.  $c = 1.0 \times 10^{-5}$  M, excited with EPL picosecond pulsed laser ( $\lambda_{ex} = 510$  nm). Detected with TCSPC mode. 20 °C.

**Table S1** The Photophysical Properties of the **BDP-1**

|              | Solvent | $\lambda_{abs}$ [a] ( $\epsilon$ [b]) | $\lambda_F$ [c] | $\Phi_F$ [d]      | $\tau_F$ [e] | $\Phi_{\Delta}$ [f] | $\Phi_T$ [g] |
|--------------|---------|---------------------------------------|-----------------|-------------------|--------------|---------------------|--------------|
| <b>BDP-1</b> | HEX     | 562 (1.46)                            | 568             | 0.37 [h]/0.34 [i] | 4.4          | 0.17 [h]/0.24 [i]   | 0.41         |
|              | TOL     | 566 (1.31)                            | 575             | 0.47 [h]/0.43 [i] | 4.7          | 0.26 [h]/0.31 [i]   | 0.41         |
|              | DCM     | 564 (1.21)                            | 572             | 0.31 [h]/0.29 [i] | 3.6          | 0.55 [h]/0.59 [i]   | 0.56         |
|              | ACN     | 557 (1.13)                            | 568             | 0.36 [h]/0.32 [i] | 4.7          | 0.41 [h]/0.45 [i]   | 0.39         |

[a]  $c = 1.0 \times 10^{-5}$  M, in nm. [b] Molar absorption coefficient.  $\epsilon$  values are in  $10^5 M^{-1} cm^{-1}$ . [c] Fluorescence emission maxima wavelength, in nm. [d] Absolute fluorescence quantum yield determined by optical integrating sphere, error:  $\pm 0.01$ . [e] Fluorescence lifetime,  $\lambda_{ex} = 510$  nm, in ns,  $c = 1.0 \times 10^{-5}$  M. [f] Singlet oxygen quantum yield ( $\Phi_{\Delta}$ ),  $Ru(bpy)_3$  as standard ( $\Phi_{\Delta} = 0.57$  in ACN) when excited into the  $S_2$  state. 2,6-diiodobodipy was used as standard ( $\Phi_{\Delta} = 0.85$  in toluene) when excited into the  $S_1$  state. Estimated determination error:  $\pm 0.03$ . [g] Triplet state quantum yield, 2,6-diiodobodipy as standard ( $\Phi_T = 0.88$  in toluene) when excited at  $S_0 \rightarrow S_1$  transition. [h] Excited at  $S_0 \rightarrow S_1$  transition. [i] Excited at  $S_0 \rightarrow S_2$  transition.

## 2.0 Singlet Oxygen Quantum Yield.

Singlet oxygen quantum yields ( $\Phi_{\Delta}$ ) were determined by relative method using Eq. S1. 1,3-diphenylisobenzofuran (DPBF) was used as  $^1\text{O}_2$  scavenger.

$$\Phi_{\text{sam}} = \Phi_{\text{std}} \left( \frac{1 - 10^{-A_{\text{std}}}}{1 - 10^{-A_{\text{sam}}}} \right) \left( \frac{m_{\text{sam}}}{m_{\text{std}}} \right) \left( \frac{\eta_{\text{sam}}}{\eta_{\text{std}}} \right)^2 \quad (\text{Eq. S1})$$

In the equation, “sam” and “std” represent the sample and standard, respectively.  $\Phi$ ,  $A$ ,  $m$  and  $\eta$  represent as singlet oxygen quantum yield, absorbance at excitation wavelength, the slope of the change of absorbance of DPBF at 414 nm over photo-irradiation time and refractive index of solvent used for measurement.

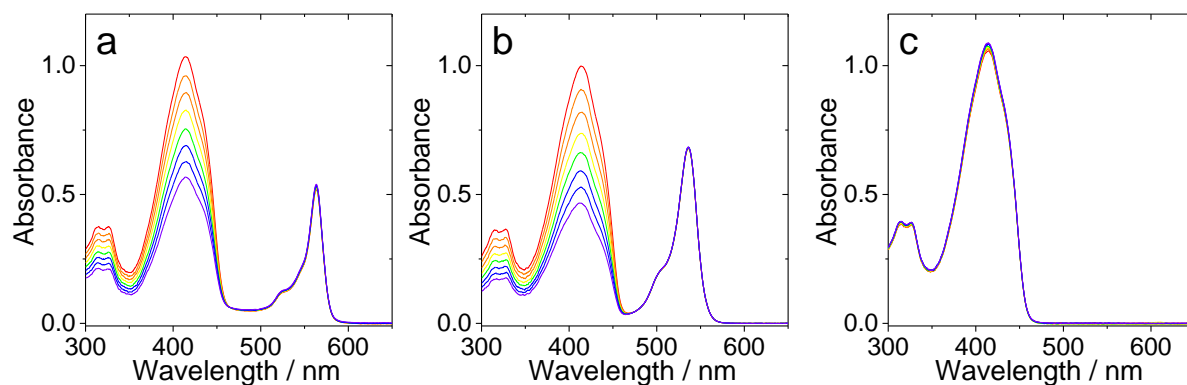

**Fig. S6** Monitoring the  $^1\text{O}_2$  production using UV–Vis absorption changes of the DPBF upon photo-irradiation with (a) **BDP-1** and DPBF in DCM, (b) **BDP-2** and DPBF in toluene and (c) DPBF in DCM. Optical matched solution was used,  $\lambda_{\text{ex}} = 550 \text{ nm}$ , the irradiation time for each data point is 20 s ( $6 \text{ mJ cm}^{-2}$ ). 20 °C.

### 3.0 Electrochemical and Spectroelectrochemistry Data.

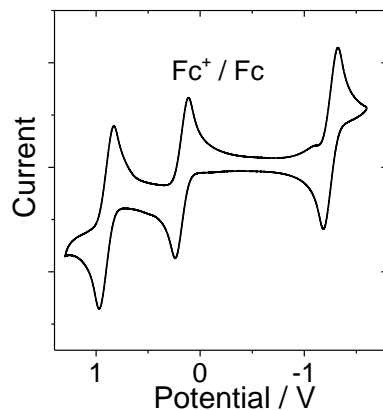

**Fig. S7** Cyclic voltammogram of the **BDP-1**. Ferrocene (Fc) was used as internal reference. In deaerated DCM containing 0.10 M Bu<sub>4</sub>N[PF<sub>6</sub>] as supporting electrolyte, Ag/AgNO<sub>3</sub> as reference electrode. Scan rates: 50 mV/s.  $c = 1.0 \times 10^{-3}$  M, 20 °C.

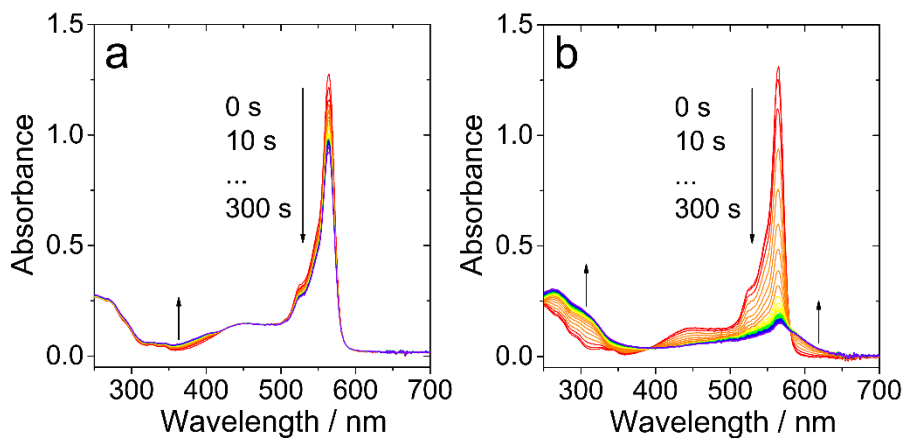

**Fig. S8** Spectroelectrochemistry traces of the UV-Vis absorption spectra observed at controlled-potential. (a) **BDP-1** at  $-1.17$  V and (b) **BDP-1** at  $+0.95$  V. In solution of 0.10 M Bu<sub>4</sub>N[PF<sub>6</sub>] of DCM. 20 °C.

#### 4.0 Sub-nanosecond Time-Resolved Transient Absorption Spectra.

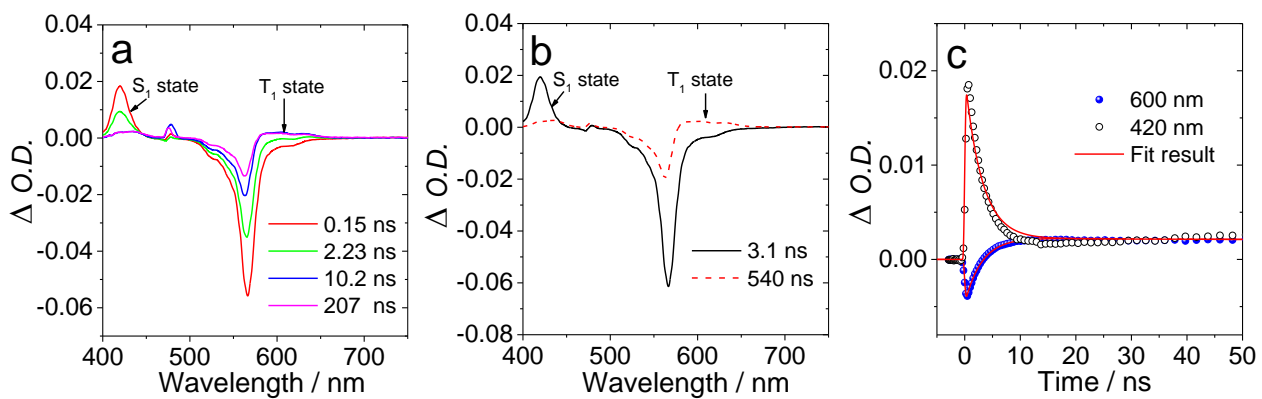

**Fig. S9** Femtosecond transient absorption spectra of **BDP-1**. (a) Transient absorption spectra, (b) Evolution-associated difference spectra (EADS) and (c) Decay traces at selected wavelengths. EADS were obtained by singular value decomposition (SVD) and global fitting (sequential model).  $\lambda_{\text{ex}} = 475 \text{ nm}$ ,  $c = 1.0 \times 10^{-5} \text{ M}$  in DCM,  $20 \text{ }^\circ\text{C}$ .



## 5.0 Nanosecond Time-Resolved Transient Absorption Spectra.

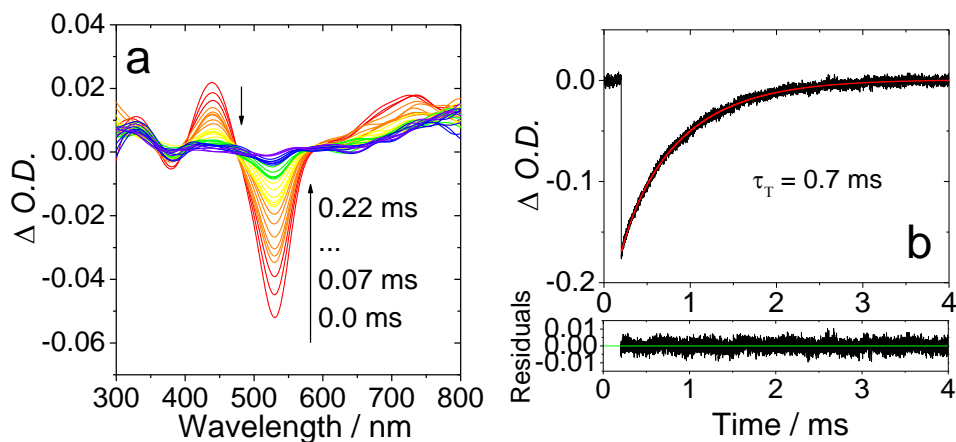

**Fig. S10** (a) Nanosecond transient absorption spectra of **BDP-2** in Clear Flex 50 film under  $N_2$  atmosphere. (b) Decay trace at 530 nm.  $\lambda_{ex} = 520$  nm,  $17.6 \mu\text{mol/g}$  (**BDP-2**/Clear Flex 50<sup>®</sup>),  $20^\circ\text{C}$ .

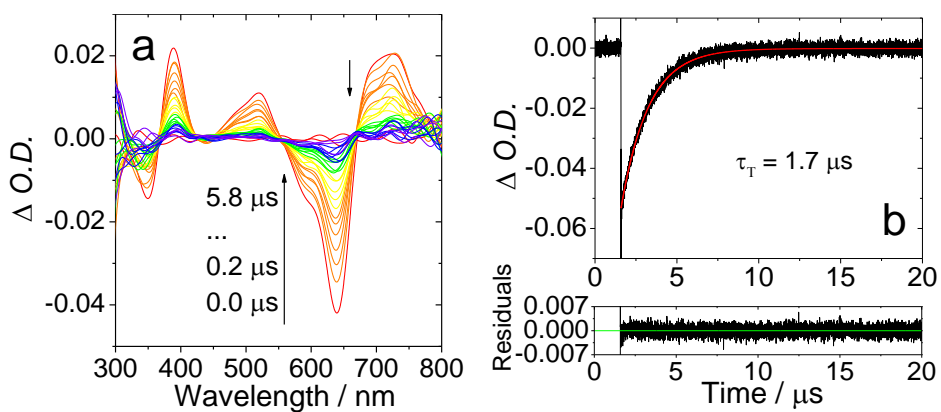

**Fig. S11** (a) Nanosecond transient absorption spectra of **BDP-3** in Clear Flex 50 film under  $N_2$  atmosphere. (b) Decay trace at 560 nm.  $\lambda_{ex} = 550$  nm,  $17.6 \mu\text{mol/g}$  (**BDP-3**/Clear Flex 50<sup>®</sup>),  $20^\circ\text{C}$ .

## 6.0 TREPR Spectra of the Triplet State of BDP-1 at Different Delay Times after Laser Flash

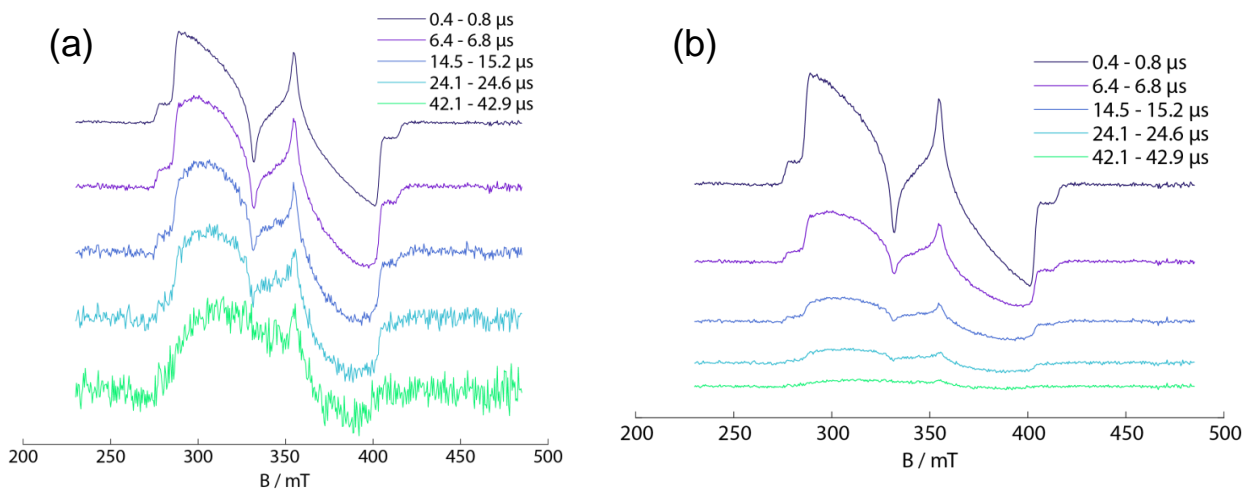

**Fig. S12** The TREPR spectra of **BDP-1** at different delay times after laser flash. (a) Normalized spectra; (b) Original spectra. Recorded by excitation of the frozen solution with 532 nm nanosecond pulsed laser. In toluene/MeTHF (3:1, v/v). 80 K. Integration time window is indicated for each trace.

## 7.0 DFT Calculation.

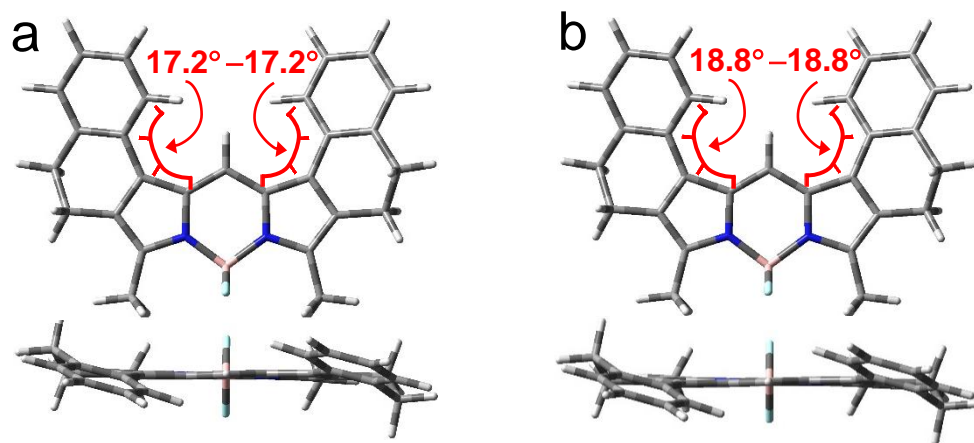

**Fig. S13** Optimized geometries and the dihedral angles of **BDP-1** (a)  $S_1$  state and (b)  $T_1$  state. DFT and TDDFT computation was performed at B3LYP/6-31G(d) level with Gaussian 09W.

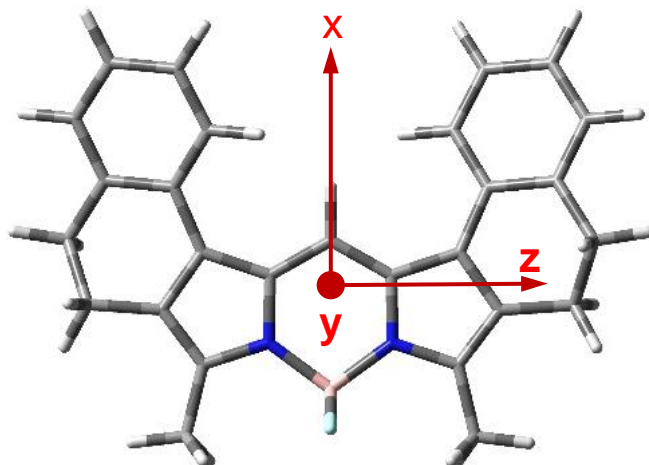

**Table S2. X, Y and Z components of the computed SOC matrix elements of BDP-1**

| Involved excited states        | X-component (cm <sup>-1</sup> ) | Y-component (cm <sup>-1</sup> ) | Z-component (cm <sup>-1</sup> ) | Total <sup>a</sup> (cm <sup>-1</sup> ) |
|--------------------------------|---------------------------------|---------------------------------|---------------------------------|----------------------------------------|
| S <sub>1</sub> -T <sub>1</sub> | 0.03                            | -0.40                           | 0.22                            | 0.45749                                |
| S <sub>1</sub> -T <sub>2</sub> | -0.08                           | -0.13                           | 0.02                            | 0.15394                                |
| S <sub>1</sub> -T <sub>3</sub> | 0.02                            | 1.96                            | -0.13                           | 1.96441                                |
| S <sub>2</sub> -T <sub>1</sub> | 0.04                            | -0.42                           | 0.19                            | 0.46271                                |
| S <sub>2</sub> -T <sub>2</sub> | 0.03                            | 0.47                            | -0.15                           | 0.49427                                |
| S <sub>2</sub> -T <sub>3</sub> | 0.05                            | 0.66                            | 0.14                            | 0.67654                                |

<sup>a</sup> Formula used to calculate total SOC from its components is  $Total = \sqrt{x^2 + y^2 + z^2}$

## 8.0 Application in Photodynamic Therapy

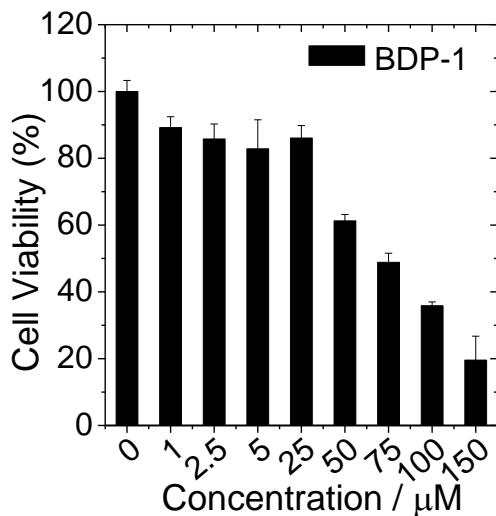

**Fig. S14** Comparison of the cell viability of HeLa cells with pre-treated **BDP-1** with different concentration without light irradiation.

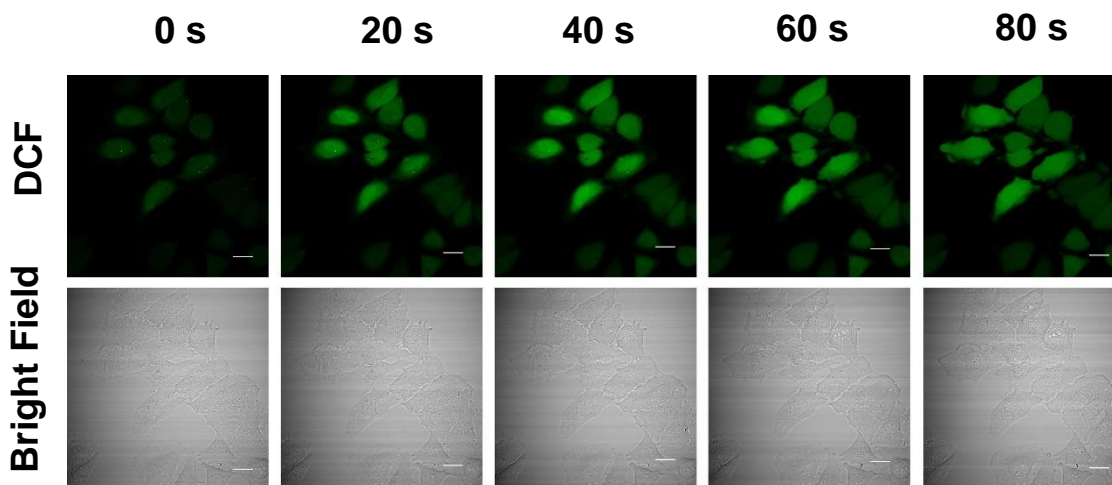

**Fig. S15** Detection of intracellular ROS generation in HeLa cells. The cells were irradiation with 559 nm after incubated with 3  $\mu\text{M}$  **BDP-1** and DCF-DA. The channel of fluorescence image of DCF ( $\lambda_{\text{ex}} = 488 \text{ nm}$ ;  $\lambda_{\text{em}} = 500\text{--}540 \text{ nm}$ ) and transmitted light images. Scale bar: 20  $\mu\text{m}$ .

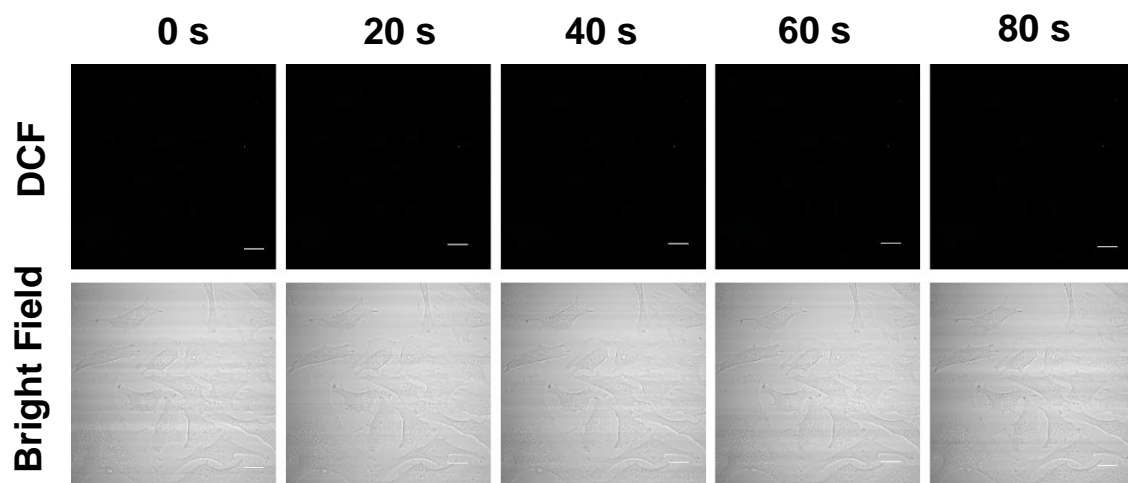

**Fig. S16** Detection of intracellular ROS generation in HeLa cells. The cells were irradiation with 559 nm after incubated with DCF-DA. The channel of fluorescence image of DCF ( $\lambda_{\text{ex}} = 488 \text{ nm}$ ;  $\lambda_{\text{em}} = 500\text{--}540 \text{ nm}$ ) and transmitted light images. Scale bar: 20  $\mu\text{m}$ .
